# Supplementary material for: Second primary malignancies in cervical cancer and endometrial cancer survivors: a population-based analysis
Source: publisher site journal article supplement (doi:10.18632/aging.204047), 2022-05-04
Supplement: Supplementary file [file aging-v14i9-204047-supplementary-material-SD1.pdf]

## SUPPLEMENTARY TABLES

**Supplementary Table 1. Interactions between HPV, smoking, and hormone with RT in the potential risk of SPMs from cervical cancer and endometrial cancer survivors with 60 months latency since the initial primary diagnosis, SEER, 1988–2015.**

| Types of interactions       | Variables <sup>§</sup>   | HPV<br>Value (95% CI), <i>P</i>                        | Smoking<br>Value (95% CI), <i>P</i>                    | Hormone<br>Value (95% CI), <i>P</i>                    |
|-----------------------------|--------------------------|--------------------------------------------------------|--------------------------------------------------------|--------------------------------------------------------|
| Multiplicative interactions | RT in cervical cancer    | 1.1 (0.7–1.7), <sup>#</sup> <i>P</i> = 0.7             | 1.5 (1.1–2.1), <sup>#</sup> <i>P</i> = 0.017           | 0.76 (0.55–1.07), <sup>#</sup> <i>P</i> = 0.12         |
|                             | RT in Endometrial cancer | 0.74 (0.53–1.03), <sup>#</sup> <i>P</i> = 0.07         | 1.1 (0.8–1.3), <sup>#</sup> <i>P</i> = 0.6             | 0.90 (0.73–1.11), <sup>#</sup> <i>P</i> = 0.33         |
| Additive interactions       | RT in cervical cancer    | RERI: 0.20 (–0.70–1.09), <sup>#</sup> <i>P</i> = 0.67  | RERI: 0.55 (0.07–1.03), <sup>#</sup> <i>P</i> = 0.03   | RERI: –0.49 (–1.28–0.31), <sup>#</sup> <i>P</i> = 0.23 |
|                             |                          | AP: 0.09 (–0.29–0.46), <sup>#</sup> <i>P</i> = 0.65    | AP: 0.27 (0.06–0.49), <sup>#</sup> <i>P</i> = 0.01     | AP: –0.19 (–0.52–0.15), <sup>#</sup> <i>P</i> = 0.27   |
|                             |                          | S: 1.2 (0.6–2.5), <sup>#</sup> <i>P</i> = 0.7          | S: 2.2 (0.9–5.5), <sup>#</sup> <i>P</i> = 0.1          | S: 0.77 (0.49–1.19), <sup>#</sup> <i>P</i> = 0.24      |
|                             | RT in Endometrial cancer | RERI: –0.62 (–1.16–0.07), <sup>#</sup> <i>P</i> = 0.03 | RERI: –0.11 (–0.50–0.29), <sup>#</sup> <i>P</i> = 0.60 | RERI: –0.21 (–0.72–0.31), <sup>#</sup> <i>P</i> = 0.43 |
|                             |                          | AP: –0.44 (–0.90–0.03), <sup>#</sup> <i>P</i> = 0.06   | AP: –0.05 (–0.25–0.15), <sup>#</sup> <i>P</i> = 0.61   | AP: –0.06 (–0.21–0.09), <sup>#</sup> <i>P</i> = 0.44   |
|                             |                          | S: 0.40 (0.15–1.04), <sup>#</sup> <i>P</i> = 0.06      | S: 0.90 (0.62–1.32), <sup>#</sup> <i>P</i> = 0.60      | S: 0.92 (0.76–1.13), <sup>#</sup> <i>P</i> = 0.43      |

Abbreviations: HPV: human papillomavirus; RT: radiotherapy; no RT: not received radiotherapy; SPMs: second primary malignancies; RERI: the relative excess risk due to interaction; AP: the attribution proportion due to interaction; S: the synergy index. <sup>§</sup>Interaction terms included RT with HPV/smoking/hormone, respectively. <sup>#</sup>*P* for interaction was derived from Cox regression analyses. <sup>#</sup>*P* for interaction was derived from Cox regression analyses and Anderson’s excel table.

**Supplementary Table 2. Interactions between smoking with RT in the potential risk of SPMs from cervical cancer and endometrial cancer survivors with 12 months latency since the initial primary diagnosis, SEER, 1988–2015.**

| Types of interactions       | Variables                | Smoking <sup>1</sup><br>Value (95% CI), <i>P</i>       | Smoking <sup>2</sup><br>Value (95% CI), <i>P</i>      |
|-----------------------------|--------------------------|--------------------------------------------------------|-------------------------------------------------------|
| Multiplicative interactions | RT in cervical cancer    | 1.7 (1.3–2.3), <sup>#</sup> <i>P</i> < 0.001           | 1.5 (1.1–1.9), <sup>#</sup> <i>P</i> = 0.004          |
|                             | RT in endometrial cancer | 1.1 (0.9–1.3), <sup>#</sup> <i>P</i> = 0.5             | 1.0 (0.9–1.2), <sup>#</sup> <i>P</i> = 0.7            |
| Additive interactions       | RT in cervical cancer    | RERI: 0.87 (0.42–1.31), <sup>#</sup> <i>P</i> < 0.001  | RERI: 0.54 (0.24–0.84), <sup>#</sup> <i>P</i> < 0.001 |
|                             |                          | AP: 0.36 (0.21–0.52), <sup>#</sup> <i>P</i> < 0.001    | AP: 0.32 (0.15–0.49), <sup>#</sup> <i>P</i> < 0.001   |
|                             |                          | S: 2.6 (1.3–5.3), <sup>#</sup> <i>P</i> = 0.006        | S: 5.1 (0.5–55.1), <sup>#</sup> <i>P</i> = 0.18       |
|                             | RT in endometrial cancer | RERI: –0.03 (–0.32–0.27), <sup>#</sup> <i>P</i> = 0.87 | RERI: 0.03 (–0.11–0.17), <sup>#</sup> <i>P</i> = 0.68 |
|                             |                          | AP: –0.01 (–0.16–0.13), <sup>#</sup> <i>P</i> = 0.87   | AP: 0.03 (–0.13–0.20), <sup>#</sup> <i>P</i> = 0.68   |
|                             |                          | S: 0.98 (0.74–1.29), <sup>#</sup> <i>P</i> = 0.87      | S: 0.81 (0.32–2.09), <sup>#</sup> <i>P</i> = 0.67     |

Abbreviations: SPMs: second primary malignancies; SEER: surveillance, epidemiology, and end results; RT: received radiotherapy; RERI: the relative excess risk due to interaction; AP: the attribution proportion due to interaction; S: the synergy index. <sup>#</sup>*P* for interaction was derived from Cox regression analyses. <sup>#</sup>*P* for interaction was derived from Cox regression analyses and Anderson’s excel table. <sup>1</sup>Cancers of the esophagus, lung, bronchus, and bladder were classified as potentially smoking-related SPMs. <sup>2</sup>Cancers of the mouth, throat, larynx, esophagus, lung, liver, stomach, pancreas, bladder, kidney, prostate, colon, and rectum were classified as potentially smoking-related SPMs.

**Supplementary Table 3. Potential site SIRs by radiotherapy status of index cervical cancer and endometrial cancer survivors, SEER, 1988–2015, with 60 months latency since the initial primary diagnosis.**

| Site of second primary malignancy | Cervical cancer, RT |                           | Endometrial cancer, RT |                           | Cervical cancer, no RT |                           | Endometrial cancer, no RT |                           |
|-----------------------------------|---------------------|---------------------------|------------------------|---------------------------|------------------------|---------------------------|---------------------------|---------------------------|
|                                   | O/E                 | SIR (95% CI) <sup>#</sup> | O/E                    | SIR (95% CI) <sup>#</sup> | O/E                    | SIR (95% CI) <sup>#</sup> | O/E                       | SIR (95% CI) <sup>#</sup> |
| HPV-related SPMs                  | 46/13               | 3.5* (2.3–5.0)            | 61/35                  | 1.8* (1.2–2.3)            | 57/22                  | 2.6* (1.9–3.3)            | 112/110                   | 1.0 (0.8–1.3)             |
| Oropharynx                        | 3/2                 | 1.4 (0.3–4.8)             | 6/6                    | 1.0 (0.4–2.4)             | 3/4                    | 0.79 (0.28–2.13)          | 13/18                     | 0.74 (0.40–1.46)          |
| Female Genital System             | 30/3                | 8.9* (6.0–12.7)           | 29/11                  | 2.6* (1.8–3.8)            | 37/6                   | 6.6* (4.6–9.1)            | 33/32                     | 1.0 (0.7–1.4)             |
| Vagina                            | 10/1                | 16.6* (7.9–30.4)          | 13/2                   | 7.4* (3.9–12.6)           | 25/1                   | 26.7* (17.3–39.5)         | 14/5                      | 2.7* (1.5–4.6)            |
| Vulva                             | 17/2                | 8.9* (5.2–14.2)           | 15/7                   | 2.3* (1.3–3.7)            | 18/19                  | 3.1* (1.5–5.8)            | 18/19                     | 0.94 (0.56–1.48)          |
| Anus, Anal Canal and Anorectum    | 0/2                 | 0.00 (0.00–2.43)          | 1/4                    | 0.24 (0.01–1.35)          | 7/3                    | 2.4 (1.0–5.0)             | 5/13                      | 0.40* (0.13–0.92)         |
| Rectum                            | 13/6                | 2.1* (1.1–3.6)            | 25/16                  | 1.6* (1.0–2.3)            | 10/10                  | 0.99 (0.48–1.82)          | 60/48                     | 1.3 (1.0–1.6)             |
| Smoking-related SPMs              | 139/55              | 2.5* (2.1–3.0)            | 188/188                | 1.0 (0.9–1.2)             | 119/77                 | 1.5* (1.3–1.8)            | 340/546                   | 0.62* (0.56–0.69)         |
| Esophagus                         | 3/2                 | 1.7 (0.4–4.9)             | 6/6                    | 1.1 (0.4–2.3)             | 3/2                    | 1.2 (0.3–3.6)             | 9/16                      | 0.55 (0.25–1.05)          |
| Lung and Bronchus                 | 115/46              | 2.5* (2.1–3.0)            | 130/152                | 0.85 (0.71–1.01)          | 100/64                 | 1.6* (1.3–1.9)            | 259/445                   | 0.58* (0.51–0.66)         |
| Bladder                           | 21/8                | 2.7* (1.7–4.1)            | 52/30                  | 1.8* (1.3–2.3)            | 16/11                  | 1.5 (0.9–2.4)             | 72/84                     | 0.85 (0.67–1.08)          |
| Hormone-related SPMs              | 94/115              | 0.82* (0.66–1.00)         | 276/286                | 0.96 (0.85–1.08)          | 157/212                | 0.74* (0.63–0.87)         | 834/880                   | 0.95 (0.88–1.01)          |
| Female Breast                     | 77/105              | 0.73* (0.58–0.92)         | 272/259                | 1.1 (0.9–1.2)             | 147/194                | 0.76* (0.64–0.89)         | 808/797                   | 1.0 (1.0–1.1)             |
| Ovary                             | 17/10               | 1.7 (1.0–2.7)             | 4/28                   | 0.14* (0.04–0.37)         | 10/18                  | 0.56 (0.27–1.03)          | 26/83                     | 0.31* (0.20–0.46)         |

Abbreviations: SIR: standardized incidence ratio; SEER: surveillance, epidemiology, and end results; SPMs: second primary malignancies; RT: radiotherapy; no RT: not received radiotherapy; CI: confidence interval; O: observed number of cancer patients; E: expected number of cancer patients; HPV: human papillomavirus. \*P value of SIR < 0.05 was considered significant. <sup>#</sup>The 95% CI was automatically generated by the SEER MP-SIR.

**Supplementary Table 4. Potential site SIRs by radiotherapy status of index cervical cancer and endometrial cancer survivors received hysterectomy and/or ovariectomy, SEER, 1988–2015, with 12 months latency since the initial primary diagnosis.**

| Site of second primary malignancy | Cervical cancer, RT |                           | Endometrial cancer, RT |                           | Cervical cancer, no RT |                           | Endometrial cancer, no RT |                           |
|-----------------------------------|---------------------|---------------------------|------------------------|---------------------------|------------------------|---------------------------|---------------------------|---------------------------|
|                                   | O/E                 | SIR (95% CI) <sup>#</sup> | O/E                    | SIR (95% CI) <sup>#</sup> | O/E                    | SIR (95% CI) <sup>#</sup> | O/E                       | SIR (95% CI) <sup>#</sup> |
| HPV-related SPMs                  | 24/6                | 3.7* (2.3–5.4)            | 99/60                  | 1.6* (1.3–1.9)            | 55/22                  | 2.5* (1.9–3.2)            | 191/172                   | 1.1 (1.0–1.3)             |
| Oropharynx                        | 1/1                 | 0.85 (0.12–4.36)          | 7/10                   | 0.70 (0.30–1.38)          | 4/3                    | 1.2 (0.5–2.7)             | 19/30                     | 0.63 (0.39–1.02)          |
| Female Genital System             | 16/2                | 9.8* (5.6–16.0)           | 47/17                  | 2.7* (2.0–3.6)            | 37/6                   | 6.8* (4.8–9.3)            | 80/48                     | 1.7* (1.3–2.1)            |
| Vagina                            | 7/1                 | 24.6* (9.9–50.6)          | 21/3                   | 7.5* (4.6–11.4)           | 29/1                   | 31.6* (21.2–45.4)         | 47/8                      | 6.1* (4.5–8.1)            |
| Vulva                             | 9/1                 | 9.8* (4.5–18.6)           | 25/10                  | 2.4* (1.6–3.6)            | 5/3                    | 1.6 (0.5–3.8)             | 29/28                     | 1.0 (0.7–1.5)             |
| Anus, Anal Canal and Anorectum    | 0/1                 | 0.00 (0.00–4.82)          | 3/7                    | 0.45 (0.09–1.31)          | 4/3                    | 1.5 (0.4–3.7)             | 9/19                      | 0.47* (0.21–0.69)         |
| Rectum                            | 8/3                 | 2.7* (1.2–5.3)            | 41/27                  | 1.5* (1.1–2.1)            | 10/10                  | 1.0 (0.5–1.9)             | 83/75                     | 1.1 (0.7–1.4)             |
| Smoking-related SPMs              | 64/25               | 2.6* (2.0–3.3)            | 315/301                | 1.1 (1.0–1.2)             | 126/76                 | 1.7* (1.4–2.0)            | 582/810                   | 0.72* (0.66–0.78)         |
| Esophagus                         | 1/1                 | 1.3 (0.0–7.0)             | 9/9                    | 0.99 (0.45–1.88)          | 1/2                    | 0.42 (0.01–2.32)          | 18/24                     | 0.74 (0.44–1.17)          |
| Lung and Bronchus                 | 0/1                 | 0.00 (0.00–5.94)          | 11/9                   | 1.3 (0.6–2.3)             | 108/63                 | 1.7* (1.4–2.1)            | 12/23                     | 0.53* (0.27–0.92)         |
| Bladder                           | 14/4                | 4.0* (2.2–6.8)            | 71/46                  | 1.5* (1.2–1.9)            | 17/11                  | 1.6 (0.9–2.6)             | 115/124                   | 0.93 (0.77–1.12)          |
| Hormone-related SPMs              | 41/60               | 0.68* (0.49–0.92)         | 472/486                | 0.97 (0.89–1.06)          | 155/212                | 0.73* (0.62–0.85)         | 1360/1389                 | 0.98 (0.93–1.03)          |
| Female Breast                     | 36/55               | 0.66* (0.46–0.91)         | 462/439                | 1.1 (1.0–1.2)             | 145/195                | 0.75* (0.63–0.88)         | 1308/1258                 | 1.0 (0.9–1.1)             |
| Ovary                             | 5/5                 | 0.96 (0.31–2.24)          | 10/46                  | 0.22* (0.10–0.40)         | 10/18                  | 0.55 (0.27–1.02)          | 52/131                    | 0.40* (0.30–0.52)         |

Abbreviations: SIR: standardized incidence ratio; SEER: surveillance, epidemiology, and end results; RT: radiotherapy; no RT: not received radiotherapy; CI: confidence interval; SPMs: second primary malignancies; O: observed number of cancer patients; E: expected number of cancer patients; HPV: human papillomavirus. <sup>§</sup>Hysterectomy and/or ovariectomy: total hysterectomy, modified radical or extended hysterectomy, radical hysterectomy, extended radical hysterectomy with/without removal of tubes and ovaries. \*P value of SIR < 0.05 was considered significant. <sup>#</sup>The 95% CI was automatically generated by the SEER MP-SIR.

**Supplementary Table 5. Potential site SIRs sub-grouped by median age of index cervical cancer and endometrial cancer survivors, SEER, 1988–2015, with 12 months latency since the initial primary diagnosis.**

| Site of second primary malignancy | Cervical cancer, age <sup>§</sup> < 44 |                           | Cervical cancer, age <sup>§</sup> ≥ 44 |                           | Endometrial cancer, age <sup>§</sup> < 62 |                           | Endometrial cancer, age <sup>§</sup> ≥ 62 |                           |
|-----------------------------------|----------------------------------------|---------------------------|----------------------------------------|---------------------------|-------------------------------------------|---------------------------|-------------------------------------------|---------------------------|
|                                   | O/E                                    | SIR (95% CI) <sup>#</sup> | O/E                                    | SIR (95% CI) <sup>#</sup> | O/E                                       | SIR (95% CI) <sup>#</sup> | O/E                                       | SIR (95% CI) <sup>#</sup> |
| HPV-related SPMs                  | 45/15                                  | 3.0* (2.0–4.3)            | 106/33                                 | 3.2* (2.5–4.1)            | 125/97                                    | 1.3* (1.0–1.6)            | 174/141                                   | 1.2* (1.1–1.4)            |
| Oropharynx                        | 3/3                                    | 1.2 (0.2–3.8)             | 8/5                                    | 1.5 (0.6–3.2)             | 16/18                                     | 0.90 (0.44–1.58)          | 13/20                                     | 0.64 (0.32–1.18)          |
| Female Genital System             | 32/4                                   | 8.7* (6.0–12.3)           | 67/8                                   | 7.9* (6.1–10.1)           | 49/25                                     | 2.0* (1.5–2.6)            | 81/42                                     | 1.9* (1.5–2.4)            |
| Vagina                            | 18/1                                   | 32.0* (19.0–50.6)         | 39/2                                   | 25.0* (17.8–34.1)         | 28/4                                      | 7.2* (4.8–10.4)           | 42/7                                      | 5.9* (4.3–8.0)            |
| Vulva                             | 13/2                                   | 6.1* (3.2–10.4)           | 23/5                                   | 4.8* (3.0–7.2)            | 18/13                                     | 1.4 (0.8–2.1)             | 37/27                                     | 1.4 (1.0–1.9)             |
| Anus, Anal Canal and Anorectum    | 4/2                                    | 1.9 (0.5–4.7)             | 6/4                                    | 1.7 (0.6–3.6)             | 6/13                                      | 0.46* (0.17–1.00)         | 6/14                                      | 0.43* (0.16–0.94)         |
| Rectum                            | 7/7                                    | 1.1 (0.4–2.2)             | 26/16                                  | 1.6* (1.0–2.4)            | 54/41                                     | 1.3 (1.0–1.7)             | 77/66                                     | 1.2 (0.9–1.5)             |
| Smoking-related SPMs              | 85/30                                  | 2.9* (2.3–3.6)            | 336/151                                | 2.2* (2.0–2.5)            | 303/390                                   | 0.78* (0.69–0.87)         | 631/767                                   | 0.82* (0.76–0.89)         |
| Esophagus                         | 1/1                                    | 0.99 (0.02–5.50)          | 9/5                                    | 1.9 (0.9–3.5)             | 5/11                                      | 0.46 (0.15–1.07)          | 24/24                                     | 1.0 (0.6–1.5)             |
| Lung and Bronchus                 | 66/25                                  | 2.7* (2.1–3.4)            | 281/125                                | 2.3* (2.0–2.5)            | 236/327                                   | 0.72* (0.63–0.82)         | 474/619                                   | 0.77* (0.70–0.84)         |
| Bladder                           | 18/4                                   | 4.4* (2.6–7.0)            | 46/21                                  | 2.2* (1.6–2.9)            | 62/53                                     | 1.2 (0.9–1.5)             | 133/125                                   | 1.1 (0.9–1.3)             |
| Hormone-related SPMs              | 136/164                                | 0.83* (0.69–0.98)         | 204/288                                | 0.71* (0.62–0.81)         | 825/928                                   | 0.89* (0.83–0.95)         | 1081/1027                                 | 1.1 (1.0–1.1)             |
| Female Breast                     | 121/152                                | 0.80* (0.66–0.95)         | 179/261                                | 0.69* (0.59–0.79)         | 786/848                                   | 0.93* (0.86–0.99)         | 1046/922                                  | 1.1* (1.1–1.2)            |
| Ovary                             | 15/13                                  | 1.2 (0.7–1.9)             | 25/26                                  | 0.95 (0.61–1.40)          | 39/80                                     | 0.49* (0.35–0.67)         | 35/105                                    | 0.33* (0.23–0.46)         |

Abbreviations: SIR: standardized incidence ratio; SEER: surveillance, epidemiology, and end results; CI: confidence interval; O: observed number of cancer patients; E: expected number of cancer patients; SPMs: second primary malignancies; HPV: human papillomavirus. <sup>§</sup>Median age in cervical cancer was 44 years old. <sup>§</sup>Median age in endometrial cancer was 62 years old. \*P value of SIR < 0.05 was considered significant. <sup>#</sup>The 95% CI was automatically generated by the SEER MP-SIR.

**Supplementary Table 6. Potential site SIRs sub-grouped by different latency of index cervical cancer survivors, SEER, 1988–2015.**

| Site of second primary malignancy | 12–35 months |                           | 36–59 months |                           | 60–119 months |                           | 120+ months |                           |
|-----------------------------------|--------------|---------------------------|--------------|---------------------------|---------------|---------------------------|-------------|---------------------------|
|                                   | O/E          | SIR (95% CI) <sup>#</sup> | O/E          | SIR (95% CI) <sup>#</sup> | O/E           | SIR (95% CI) <sup>#</sup> | O/E         | SIR (95% CI) <sup>#</sup> |
| HPV-related SPMs                  | 34/6         | 5.1* (3.5–7.0)            | 14/5         | 2.5* (1.4–4.0)            | 45/12         | 3.7* (2.9–5.1)            | 55/22       | 2.5* (2.0–3.3)            |
| Oropharynx                        | 4/1          | 3.5* (1.1–8.2)            | 2/1          | 1.7 (0.3–6.0)             | 1/2           | 0.48 (0.11–2.23)          | 6/4         | 1.5 (0.6–3.1)             |
| Female Genital System             | 25/2         | 14.9* (9.7–22.1)          | 7/1          | 4.8* (2.0–10.0)           | 35/3          | 11.2* (7.8–15.5)          | 32/6        | 5.5* (3.7–7.7)            |
| Vagina                            | 20/0         | 63.7* (38.9–98.5)         | 2/0          | 7.5 (1.0–27.0)            | 19/1          | 33.3* (20.0–52.0)         | 16/1        | 16.4* (9.4–26.7)          |
| Vulva                             | 4/1          | 4.1* (1.1–10.6)           | 5/1          | 6.0* (1.9–13.9)           | 14/2          | 7.6* (4.2–12.8)           | 13/3        | 4.0* (2.1–6.8)            |
| Anus, Anal Canal and Anorectum    | 2/1          | 2.8 (0.3–10.2)            | 1/1          | 1.6 (0.0–8.9)             | 2/1           | 1.4 (0.2–5.0)             | 5/3         | 1.7 (0.6–3.9)             |
| Rectum                            | 4/3          | 1.2 (0.3–3.1)             | 5/3          | 1.8 (0.6–4.1)             | 10/6          | 1.6 (0.8–3.0)             | 14/10       | 1.4 (0.8–2.3)             |
| Smoking-related SPMs              | 98/26        | 3.8* (3.1–4.7)            | 65/22        | 3.0* (2.3–3.8)            | 101/48        | 2.1* (1.7–2.6)            | 157/85      | 1.8* (1.6–2.2)            |
| Esophagus                         | 2/1          | 2.3 (0.3–8.1)             | 2/1          | 2.7 (0.3–9.7)             | 2/2           | 1.3 (0.2–4.6)             | 4/3         | 1.5 (0.4–3.6)             |
| Lung and Bronchus                 | 81/21        | 3.8* (3.1–4.8)            | 51/18        | 2.8* (2.1–3.7)            | 95/39         | 2.4* (2.0–3.0)            | 120/71      | 1.7* (1.4–2.0)            |
| Bladder                           | 15/4         | 4.1* (2.3–6.8)            | 12/3         | 3.9* (2.0–6.7)            | 4/7           | 0.59 (0.16–1.52)          | 33/12       | 2.8* (1.9–3.9)            |
| Hormone-related SPMs              | 48/66        | 0.72* (0.53–0.96)         | 40/57        | 0.70* (0.50–0.95)         | 117/124       | 0.95 (0.78–1.14)          | 135/205     | 0.66* (0.55–0.78)         |
| Female Breast                     | 41/60        | 0.68* (0.49–0.92)         | 35/52        | 0.67* (0.47–0.93)         | 102/113       | 0.90 (0.74–1.10)          | 122/187     | 0.65* (0.54–0.78)         |
| Ovary                             | 7/6          | 1.2 (0.5–2.4)             | 5/5          | 0.99 (0.32–2.30)          | 15/11         | 1.4 (0.8–2.3)             | 13/17       | 0.75 (0.40–1.28)          |

Abbreviations: SIR: standardized incidence ratio; SEER: surveillance, epidemiology, and end results; CI: confidence interval; O: observed number of cancer patients; E: expected number of cancer patients; SPMs: second primary malignancies; HPV: human papillomavirus. \*P value of SIR <0.05 was considered significant. <sup>#</sup>The 95% CI was automatically generated by the SEER MP-SIR.

**Supplementary Table 7. Potential site SIRs sub-grouped by different latency of index endometrial cancer survivors, SEER, 1988–2015.**

| Site of second primary malignancy | 12–35 months |                           | 36–59 months |                           | 60–119 months |                           | 120+ months |                           |
|-----------------------------------|--------------|---------------------------|--------------|---------------------------|---------------|---------------------------|-------------|---------------------------|
|                                   | O/E          | SIR (95% CI) <sup>#</sup> | O/E          | SIR (95% CI) <sup>#</sup> | O/E           | SIR (95% CI) <sup>#</sup> | O/E         | SIR (95% CI) <sup>#</sup> |
| HPV-related SPMs                  | 72/49        | 1.4* (1.1–1.8)            | 49/39        | 1.2 (0.9–1.6)             | 92/78         | 1.2 (1.0–1.5)             | 83/71       | 1.2 (0.9–1.4)             |
| Oropharynx                        | 2/8          | 0.21* (0.0–0.7)           | 8/7          | 1.1 (0.6–2.2)             | 12/13         | 0.95 (0.54–1.59)          | 8/11        | 0.76 (0.38–1.41)          |
| Female Genital System             | 42/13        | 3.3* (2.4–4.4)            | 25/11        | 2.3* (1.5–3.3)            | 27/21         | 1.3 (0.8–1.8)             | 36/22       | 1.6* (1.1–2.3)            |
| Vagina                            | 33/2         | 0.70 (0.47–1.01)          | 10/2         | 5.4* (2.6–9.9)            | 13/4          | 3.7* (2.0–6.3)            | 14/3        | 4.1* (2.3–6.9)            |
| Vulva                             | 9/8          | 15.2* (10.5–21.3)         | 12/7         | 1.8 (1.0–3.2)             | 12/13         | 0.94 (0.49–1.65)          | 22/13       | 1.7* (1.0–2.5)            |
| Anus, Anal Canal and Anorectum    | 3/5          | 0.55 (0.11–1.60)          | 3/5          | 0.64 (0.13–1.88)          | 5/9           | 0.57 (0.19–1.34)          | 1/8         | 0.12* (0.00–0.69)         |
| Rectum                            | 27/23        | 1.2 (0.8–1.7)             | 17/19        | 0.87 (0.51–1.40)          | 49/35         | 1.4* (1.0–1.9)            | 38/29       | 1.3 (0.9–1.8)             |
| Smoking-related SPMs              | 207/225      | 0.92 (0.80–1.05)          | 195/195      | 1.0 (0.9–1.2)             | 312/375       | 0.83* (0.74–0.93)         | 220/362     | 0.61* (0.53–0.69)         |
| Esophagus                         | 7/7          | 1.0 (0.4–2.1)             | 6/6          | 1.0 (0.4–2.2)             | 10/11         | 0.88 (0.42–1.62)          | 6/11        | 0.56 (0.20–1.21)          |
| Lung and Bronchus                 | 161/185      | 0.87 (0.74–1.02)          | 347/322      | 1.1 (1.0–1.2)             | 230/306       | 0.75* (0.66–0.85)         | 160/294     | 0.54* (0.46–0.63)         |
| Bladder                           | 39/33        | 1.2 (0.8–1.6)             | 30/29        | 1.0 (0.7–1.5)             | 72/57         | 1.3 (1.0–1.6)             | 54/57       | 0.94 (0.71–1.23)          |
| Hormone-related SPMs              | 428/426      | 1.0 (0.9–1.1)             | 363/355      | 1.0 (0.9–1.1)             | 650/634       | 1.0 (1.0–1.1)             | 465/539     | 0.86* (0.79–0.95)         |
| Female Breast                     | 400/387      | 1.0 (0.9–1.1)             | 347/322      | 1.1 (1.0–1.2)             | 632/574       | 1.1* (1.0–1.2)            | 453/487     | 0.93 (0.85–1.02)          |
| Ovary                             | 28/40        | 1.2 (0.5–2.4)             | 16/33        | 0.48* (0.27–0.78)         | 18/60         | 0.30* (0.18–0.47)         | 12/51       | 0.23* (0.12–0.41)         |

Abbreviations: SIR: standardized incidence ratio; SEER: surveillance, epidemiology, and end results; CI: confidence interval; O: observed number of cancer patients; E: expected number of cancer patients; SPMs: second primary malignancies; HPV: human papillomavirus. \*P value of SIR <0.05 was considered significant. <sup>#</sup>The 95% CI was automatically generated by the SEER MP-SIR.

**Supplementary Table 8. Potential site SIRs sub-grouped by stage of index cervical cancer and endometrial cancer survivors, SEER, 1988–2015, with 12 months latency since the initial primary diagnosis.**

| Site of second primary malignancy | Cervical cancer, stage I |                           | Cervical cancer, stage II-III |                           | Endometrial cancer, stage I |                           | Endometrial cancer, stage II-III |                           |
|-----------------------------------|--------------------------|---------------------------|-------------------------------|---------------------------|-----------------------------|---------------------------|----------------------------------|---------------------------|
|                                   | O/E                      | SIR (95% CI) <sup>#</sup> | O/E                           | SIR (95% CI) <sup>#</sup> | O/E                         | SIR (95% CI) <sup>#</sup> | O/E                              | SIR (95% CI) <sup>#</sup> |
| HPV-related SPMs                  | 80/25                    | 3.0* (2.4–3.8)            | 38/10                         | 3.5* (2.5–4.7)            | 201/181                     | 1.1 (1.0–1.3)             | 62/26                            | 2.3* (1.8–3.0)            |
| Oropharynx                        | 9/4                      | 2.1 (1.1–3.6)             | 1/1                           | 0.60 (0.20–2.61)          | 23/32                       | 0.72 (0.47–1.05)          | 4/4                              | 0.96 (0.33–2.22)          |
| Female Genital System             | 50/7                     | 7.3* (5.5–9.7)            | 26/3                          | 9.6* (6.3–14.0)           | 80/51                       | 1.6* (1.3–2.0)            | 35/8                             | 4.6* (3.2–6.4)            |
| Vagina                            | 32/1                     | 27.5* (18.8–38.8)         | 15/0                          | 30.9* (17.3–50.9)         | 37/8                        | 4.5* (3.2–6.2)            | 24/1                             | 19.2* (12.3–28.5)         |
| Vulva                             | 15/4                     | 3.9* (2.2–6.4)            | 10/2                          | 6.5* (3.1–11.9)           | 39/30                       | 1.3 (0.9–1.8)             | 10/4                             | 2.2* (1.1–4.1)            |
| Anus, Anal Canal and Anorectum    | 6/3                      | 1.8 (0.7–3.9)             | 0/1                           | 0.00 (0.00–3.01)          | 8/20                        | 0.39* (0.17–0.78)         | 1/3                              | 0.32 (0.01–1.76)          |
| Rectum                            | 15/12                    | 1.2 (0.7–2.0)             | 11/5                          | 2.2* (1.1–3.9)            | 90/80                       | 1.1 (0.9–1.4)             | 22/12                            | 1.8* (1.1–2.8)            |
| Smoking-related SPMs              | 178/97                   | 1.8* (1.6–2.1)            | 140/44                        | 3.2* (2.7–3.8)            | 637/869                     | 0.73* (0.68–0.79)         | 161/130                          | 1.2* (1.1–1.5)            |
| Esophagus                         | 3/3                      | 0.96 (0.20–2.8)           | 4/1                           | 2.8 (0.8–7.3)             | 21/26                       | 0.81 (0.50–1.23)          | 4/4                              | 1.0 (0.3–2.6)             |
| Lung and Bronchus                 | 145/80                   | 1.8* (1.5–2.1)            | 112/36                        | 3.1* (2.6–3.7)            | 487/710                     | 0.69* (0.63–0.75)         | 120/106                          | 1.1 (0.9–1.4)             |
| Bladder                           | 30/14                    | 2.2* (1.5–3.2)            | 24/6                          | 3.9* (2.5–5.8)            | 129/133                     | 0.97 (0.81–1.15)          | 37/20                            | 1.9* (1.3–2.6)            |
| Hormone-related SPMs              | 194/259                  | 0.75* (0.65–0.86)         | 74/97                         | 0.76* (0.60–0.96)         | 1447/1464                   | 0.99 (0.94–1.04)          | 213/225                          | 0.95 (0.83–1.09)          |
| Female Breast                     | 176/237                  | 0.74* (0.64–0.86)         | 60/88                         | 0.68* (0.52–0.87)         | 1402/1326                   | 1.1* (1.0–1.1)            | 204/204                          | 1.0 (0.9–1.2)             |
| Ovary                             | 18/22                    | 0.81 (0.48–1.29)          | 14/9                          | 1.6 (0.9–2.8)             | 45/138                      | 0.33* (0.24–0.44)         | 9/21                             | 0.43* (0.20–0.82)         |

Abbreviations: SIR: standardized incidence ratio; SEER: surveillance, epidemiology, and end results; CI: confidence interval; O: observed number of cancer patients; E: expected number of cancer patients; SPMs: second primary malignancies; HPV: human papillomavirus. \*P value of SIR <0.05 was considered significant. <sup>#</sup>The 95% CI was automatically generated by the SEER MP-SIR.

**Supplementary Table 9. Potential site SIRs sub-grouped by different attained age of index cervical cancer survivors, SEER, 1988–2015, with 12 months latency since the initial primary diagnosis.**

| Site of second primary malignancy | 20–39 |                           | 40–59   |                           | 60–79   |                           | ≥80   |                           |
|-----------------------------------|-------|---------------------------|---------|---------------------------|---------|---------------------------|-------|---------------------------|
|                                   | O/E   | SIR (95% CI) <sup>#</sup> | O/E     | SIR (95% CI) <sup>#</sup> | O/E     | SIR (95% CI) <sup>#</sup> | O/E   | SIR (95% CI) <sup>#</sup> |
| HPV-related SPMs                  | 6/1   | 5.5* (2.0–12.0)           | 69/20   | 3.5* (2.8–4.5)            | 60/21   | 2.8* (2.1–3.6)            | 16/6  | 2.8* (1.6–4.5)            |
| Oropharynx                        | 0/0   | 0                         | 7/3     | 2.1 (0.8–4.3)             | 4/4     | 1.1 (0.3–2.9)             | 0/1   | 0                         |
| Female Genital System             | 5/0   | 13.9* (4.5–32.3)          | 44/5    | 9.4* (6.8–12.7)           | 39/6    | 6.8* (4.8–9.4)            | 11/2  | 5.7* (2.7–10.5)           |
| Vagina                            | 5/0   | 106.4* (34.6–248.4)       | 28/1    | 37.9* (25.2–54.8)         | 19/1    | 19.4* (11.7–30.2)         | 5/0   | 15.8* (5.1–37.0)          |
| Vulva                             | 0/0   | 0                         | 14/3    | 4.7* (2.4–8.2)            | 17/3    | 5.2* (2.9–8.5)            | 5/2   | 3.5 (1.0–8.9)             |
| Anus, Anal Canal and Anorectum    | 1/0   | 11.5 (0.3–64.0)           | 4/3     | 1.5 (0.4–3.7)             | 5/2     | 2.1 (0.7–5.0)             | 0/0   | 0                         |
| Rectum                            | 0/0   | 0                         | 14/8    | 1.8* (1.0–2.9)            | 12/10   | 1.3 (0.7–2.3)             | 5/2   | 2.1 (0.8–4.5)             |
| Smoking-related SPMs              | 7/1   | 7.1* (2.9–14.6)           | 142/43  | 3.3* (2.8–3.9)            | 223/109 | 2.0* (1.8–2.3)            | 48/27 | 1.8* (1.3–2.3)            |
| Esophagus                         | 0/0   | 0                         | 3/1     | 2.0 (0.4–5.9)             | 7/4     | 1.8 (0.7–4.0)             | 0/1   | 0                         |
| Lung and Bronchus                 | 5/1   | 6.8* (2.2–16.0)           | 123/36  | 3.4* (2.8–4.1)            | 180/91  | 2.0* (1.7–2.3)            | 39/20 | 1.9* (1.3–2.6)            |
| Bladder                           | 2/0   | 8.7* (1.1–31.6)           | 16/6    | 2.8* (1.5–4.6)            | 36/14   | 2.5* (1.7–3.4)            | 9/5   | 1.7 (0.8–3.2)             |
| Hormone-related SPMs              | 22/14 | 1.5 (0.9–2.3)             | 169/210 | 0.80* (0.68–0.93)         | 123/190 | 0.65* (0.54–0.77)         | 25/37 | 0.70 (0.44–1.05)          |
| Female Breast                     | 20/13 | 1.5 (0.9–2.3)             | 150/193 | 0.77* (0.65–0.90)         | 112/174 | 0.64* (0.53–0.78)         | 18/33 | 0.55* (0.31–0.89)         |
| Ovary                             | 2/1   | 1.7 (0.2–6.2)             | 19/17   | 1.2 (0.7–1.9)             | 11/17   | 0.66 (0.33–1.17)          | 7/4   | 1.9 (0.8–3.9)             |

Abbreviations: SIR: standardized incidence ratio; SPMs: second primary malignancies; SEER: surveillance, epidemiology, and end results; CI: confidence interval; O: observed number of cancer patients; E: expected number of cancer patients; SPMs: second primary malignancies; HPV: human papillomavirus. \*P value of SIR <0.05 was considered significant. <sup>#</sup>The 95% CI was automatically generated by the SEER MP-SIR.

**Supplementary Table 10. Potential site SIRs sub-grouped by different attained age of index endometrial cancer survivors, SEER, 1988–2015, with 12 months latency since the initial primary diagnosis.**

| Site of second primary malignancy | 20–39 |                           | 40–59   |                           | 60–79     |                           | ≥80     |                           |
|-----------------------------------|-------|---------------------------|---------|---------------------------|-----------|---------------------------|---------|---------------------------|
|                                   | O/E   | SIR (95% CI) <sup>#</sup> | O/E     | SIR (95% CI) <sup>#</sup> | O/E       | SIR (95% CI) <sup>#</sup> | O/E     | SIR (95% CI) <sup>#</sup> |
| HPV-related SPMs                  | 3/0   | 10.4* (2.1–30.4)          | 44/32   | 1.4 (1.0–1.8)             | 176/144   | 1.2* (1.1–1.4)            | 76/65   | 1.2 (0.9–1.5)             |
| Oropharynx                        | 0/0   | 0                         | 4/6     | 0.70 (0.19–1.78)          | 19/25     | 0.76 (0.46–1.19)          | 6/8     | 0.79 (0.29–1.71)          |
| Female Genital System             | 3/0   | 35.0* (7.2–102.2)         | 18/7    | 2.5* (1.5–4.0)            | 76/40     | 1.9* (1.5–2.4)            | 32/21   | 1.5* (1.0–2.1)            |
| Vagina                            | 2/0   | 175.8* (21.3–635.0)       | 11/1    | 9.3* (4.7–16.7)           | 45/7      | 6.7* (4.9–9.1)            | 12/3    | 3.5* (1.8–6.1)            |
| Vulva                             | 1/0   | 21.2 (0.5–118.0)          | 5/4     | 1.3 (0.4–3.0)             | 31/22     | 1.4 (1.0–2.0)             | 19/15   | 1.3 (0.8–2.1)             |
| Anus, Anal Canal and Anorectum    | 0/0   | 0                         | 4/5     | 0.88 (0.24–2.26)          | 5/17      | 0.30* (0.10–0.70)         | 3/6     | 0.51 (0.10–1.48)          |
| Rectum                            | 0/0   | 0                         | 18/15   | 1.2 (0.7–2.0)             | 76/62     | 1.2 (1.0–1.5)             | 34/30   | 1.2 (0.8–1.6)             |
| Smoking-related SPMs              | 1/0   | 4.6 (0.1–25.4)            | 102/75  | 1.4* (1.1–1.7)            | 565/780   | 0.73* (0.68–0.80)         | 260/305 | 0.86* (0.76–0.97)         |
| Esophagus                         | 0/0   | 0                         | 1/2     | 0.41 (0.01–2.29)          | 17/22     | 0.83 (0.49–1.32)          | 10/11   | 0.90 (0.43–1.65)          |
| Lung and Bronchus                 | 1/0   | 6.1 (0.2–34.0)            | 82/64   | 1.3* (1.1–1.7)            | 442/651   | 0.68* (0.62–0.75)         | 183/233 | 0.79* (0.68–0.91)         |
| Bladder                           | 0/0   | 0                         | 19/10   | 2.0* (1.2–3.0)            | 106/105   | 1.0 (0.8–1.2)             | 67/61   | 1.1 (0.9–1.4)             |
| Hormone-related SPMs              | 8/4   | 2.2 (1.0–4.4)             | 265/318 | 0.84* (0.74–0.94)         | 1237/1271 | 0.98 (0.93–1.03)          | 385/365 | 1.1 (1.0–1.2)             |
| Female Breast                     | 3/3   | 0.90 (0.19–2.63)          | 243/292 | 0.84* (0.74–0.95)         | 1198/1157 | 1.0 (1.0–1.1)             | 377/321 | 1.2* (1.1–1.3)            |
| Ovary                             | 5/0   | 17.9* (5.8–41.7)          | 22/27   | 0.81 (0.51–1.23)          | 39/115    | 0.34* (0.24–0.46)         | 8/43    | 0.19* (0.08–0.37)         |

Abbreviations: SIR: standardized incidence ratio; SPMs: second primary malignancies; SEER: surveillance, epidemiology, and end results; CI: confidence interval; O: observed number of cancer patients; E: expected number of cancer patients; SPMs: second primary malignancies; HPV: human papillomavirus. \*P value of SIR <0.05 was considered significant. <sup>#</sup>The 95% CI was automatically generated by the SEER MP-SIR.

**Supplementary Table 11. Potential site SIRs by radiotherapy status of index cervical cancer and endometrial cancer survivors, SEER, 1988–2015, with 12 months latency since the initial primary diagnosis.**

| Site of second primary malignancy †      | Cervical cancer, RT |                   | Endometrial cancer, RT |                  | Cervical cancer, no RT |                   | Endometrial cancer, no RT |                   |
|------------------------------------------|---------------------|-------------------|------------------------|------------------|------------------------|-------------------|---------------------------|-------------------|
|                                          | O/E                 | SIR (95% CI)#     | O/E                    | SIR (95% CI)#    | O/E                    | SIR (95% CI)#     | O/E                       | SIR (95% CI)#     |
| Lip                                      | 2/0                 | 4.9 (0.6–17.6)    | 3/2                    | 1.7 (0.3–4.9)    | 0/1                    | 0                 | 0/5                       | 0                 |
| Salivary Gland                           | 1/1                 | 0.91 (1.02–5.05)  | 0/4                    | 0                | 2/2                    | 1.2 (0.2–4.4)     | 11/10                     | 1.1 (0.6–2.0)     |
| Floor of Mouth                           | 2/1                 | 3.8 (1.5–13.5)    | 2/2                    | 1.2 (0.2–4.3)    | 1/1                    | 1.4 (0.0–8.0)     | 1/4                       | 0.22 (0.01–1.24)  |
| Gum and Other Mouth                      | 1/2                 | 0.57 (2.01–3.2)   | 3/7                    | 0.45 (0.09–1.31) | 5/2                    | 2.4 (0.8–5.5)     | 9/18                      | 0.51* (0.23–0.96) |
| Nasopharynx                              | 1/0                 | 2.2 (0.1–12.2)    | 0/1                    | 0                | 0/1                    | 0                 | 4/3                       | 1.4 (0.4–3.7)     |
| Hypopharynx                              | 2/0                 | 5.1 (0.6–18.4)    | 1/1                    | 0.83 (0.02–4.61) | 1/0                    | 2.1 (0.1–11.6)    | 0/3                       | 0                 |
| Other Oral Cavity and Pharynx            | 0/0                 | 0                 | 1/1                    | 1.8 (0.0–9.7)    | 0/0                    | 0                 | 0/2                       | 0                 |
| Stomach                                  | 11/8                | 1.4 (8.7–2.6)     | 20/22                  | 0.9 (0.55–1.39)  | 7/8                    | 0.84 (0.34–1.73)  | 43/59                     | 0.73* (0.53–0.98) |
| Small Intestine                          | 7/2                 | 2.9* (2.2–6.0)    | 12/8                   | 1.5 (0.8–2.7)    | 1/3                    | 0.31 (0.01–1.75)  | 23/21                     | 1.1 (0.7–1.6)     |
| Cecum                                    | 16/10               | 1.6 (10.9–2.6)    | 47/39                  | 1.2 (0.9–1.6)    | 9/10                   | 0.87 (0.4–1.65)   | 109/99                    | 1.1 (0.9–1.3)     |
| Appendix                                 | 1/1                 | 1.2 (1.0–6.8)     | 0/2                    | 0                | 0/1                    | 0                 | 5/7                       | 0.74 (0.24–1.73)  |
| Ascending Colon                          | 10/8                | 1.3 (8.6–2.4)     | 57/31                  | 1.9* (1.4–2.4)   | 3/8                    | 0.37 (0.08–1.07)  | 94/79                     | 1.2 (1.0–1.5)     |
| Hepatic Flexure                          | 4/2                 | 1.9 (2.5–5.0)     | 13/8                   | 1.6 (0.9–2.8)    | 2/2                    | 0.94 (0.11–3.38)  | 33/20                     | 1.6* (1.1–2.3)    |
| Transverse Colon                         | 5/4                 | 1.3 (4.4–3.1)     | 23/15                  | 1.5 (1.0–2.3)    | 3/4                    | 0.73 (0.15–2.14)  | 56/38                     | 1.5* (1.1–1.9)    |
| Splenic Flexure                          | 1/1                 | 0.79 (1.02–4.38)  | 5/4                    | 1.2 (0.4–2.9)    | 2/1                    | 1.4 (0.2–5.1)     | 12/11                     | 1.1 (0.6–2.0)     |
| Descending Colon                         | 3/2                 | 1.3 (2.3–3.8)     | 10/7                   | 1.4 (0.7–2.6)    | 6/3                    | 2.3 (0.8–4.9)     | 15/18                     | 0.82 (0.46–1.35)  |
| Sigmoid Colon                            | 14/10               | 1.3 (10.7–2.3)    | 53/32                  | 1.7* (1.3–2.2)   | 16/13                  | 1.3 (0.7–2.1)     | 113/84                    | 1.3* (1.1–1.6)    |
| Large Intestine, NOS                     | 6/2                 | 2.6 (3.0–5.7)     | 12/9                   | 1.3 (0.7–2.3)    | 1/2                    | 0.43 (0.01–2.42)  | 15/24                     | 0.63 (0.35–1.04)  |
| Rectosigmoid Junction                    | 8/4                 | 2.1 (4.9–4.1)     | 22/11                  | 1.9* (1.2–2.9)   | 3/5                    | 0.63 (0.13–1.85)  | 36/30                     | 1.2 (0.8–1.6)     |
| Liver                                    | 2/5                 | 0.44 (5.05–1.59)  | 12/13                  | 0.91 (0.47–1.58) | 7/5                    | 1.3 (0.5–2.7)     | 36/37                     | 0.98 (0.69–1.36)  |
| Gallbladder                              | 2/2                 | 1.0 (2.1–3.7)     | 6/7                    | 0.88 (0.32–1.92) | 3/2                    | 1.4 (0.3–4.1)     | 13/18                     | 0.73 (0.39–1.24)  |
| Intrahepatic Bile Duct                   | 1/1                 | 0.92 (1.02–5.15)  | 4/4                    | 1.0 (0.3–2.6)    | 0/1                    | 0                 | 11/11                     | 1.0 (0.5–1.8)     |
| Other Biliary                            | 1/2                 | 0.53 (2.01–2.94)  | 9/7                    | 1.2 (0.6–2.4)    | 0/2                    | 0                 | 15/19                     | 0.78 (0.43–1.28)  |
| Pancreas                                 | 21/15               | 1.4 (15.9–2.1)    | 46/56                  | 0.81 (0.6–1.09)  | 4/17                   | 0.24* (0.07–0.61) | 143/149                   | 0.96 (0.81–1.13)  |
| Retroperitoneum                          | 0/0                 | 0                 | 1/1                    | 0.77 (0.02–4.28) | 2/1                    | 3.0 (0.4–10.9)    | 2/4                       | 0.55 (0.07–1.99)  |
| Peritoneum, Omentum and Mesentery        | 2/1                 | 1.6 (1.2–5.9)     | 3/5                    | 0.61 (0.13–1.79) | 2/2                    | 1.3 (0.2–4.5)     | 28/13                     | 2.1* (1.4–3.0)    |
| Other Digestive Organs                   | 3/1                 | 4.2 (1.9–12.3)    | 5/3                    | 1.8 (0.6–4.2)    | 2/1                    | 2.4 (0.3–8.6)     | 7/7                       | 0.94 (0.38–1.94)  |
| Nose, Nasal Cavity and Middle Ear        | 0/1                 | 0                 | 4/2                    | 1.9 (0.5–4.9)    | 1/1                    | 1.2 (0.0–6.6)     | 5/6                       | 0.88 (0.29–2.06)  |
| Larynx                                   | 2/2                 | 1.2 (2.1–4.1)     | 7/5                    | 1.4 (0.6–2.9)    | 6/2                    | 2.6 (1.0–5.7)     | 7/14                      | 0.51 (0.21–1.05)  |
| Pleura                                   | 0/0                 | 0                 | 1/0                    | 9.2 (0.2–51.2)   | 0/0                    | 0                 | 0/0                       | 0                 |
| Trachea                                  | 0/0                 | 0                 | 1/0                    | 5.2 (0.1–29.2)   | 0/0                    | 0                 | 0/1                       | 0                 |
| Mediastinum and Other Respiratory Organs | 0/0                 | 0                 | 0/0                    | 0                | 0/0                    | 0                 | 2/0                       | 4.9 (0.6–17.6)    |
| Bones and Joints                         | 2/1                 | 3.7 (1.4–13.3)    | 1/1                    | 0.68 (0.02–3.78) | 0/1                    | 0                 | 2/4                       | 0.48 (0.06–1.74)  |
| Soft Tissue including Heart              | 9/3                 | 3.4* (3.5–6.4)    | 11/8                   | 1.3 (0.7–2.4)    | 4/4                    | 1.0 (0.3–2.6)     | 22/23                     | 0.96 (0.6–1.45)   |
| Melanoma of the Skin                     | 11/16               | 0.68 (16.34–1.22) | 52/54                  | 0.97 (0.72–1.27) | 16/31                  | 0.51* (0.29–0.83) | 136/153                   | 0.89 (0.75–1.05)  |
| Other Non-Epithelial Skin                | 1/2                 | 0.64 (2.02–3.57)  | 9/6                    | 1.4 (0.7–2.7)    | 2/2                    | 0.89 (0.11–3.21)  | 21/17                     | 1.2 (0.8–1.9)     |
| Prostate                                 | 0/0                 | 0                 | 0/0                    | 0                | 0/0                    | 0                 | 0/0                       | 0                 |
| Testis                                   | 0/0                 | 0                 | 0/0                    | 0                | 0/0                    | 0                 | 0/0                       | 0                 |
| Penis                                    | 0/0                 | 0                 | 0/0                    | 0                | 0/0                    | 0                 | 0/0                       | 0                 |
| Other Male Genital Organs                | 0/0                 | 0                 | 0/0                    | 0                | 0/0                    | 0                 | 0/0                       | 0                 |
| Kidney                                   | 12/11               | 1.1 (11.6–1.9)    | 41/37                  | 1.1 (0.8–1.5)    | 15/16                  | 0.97 (0.54–1.59)  | 110/101                   | 1.1 (0.9–1.3)     |
| Renal Pelvis                             | 1/1                 | 1.1 (1.0–6.3)     | 4/4                    | 1.0 (0.3–2.6)    | 1/1                    | 1.1 (0.0–5.9)     | 15/10                     | 1.5 (0.8–2.4)     |
| Ureter                                   | 2/0                 | 4.0 (0.5–14.6)    | 6/2                    | 2.8* (1.0–6.0)   | 3/1                    | 5.9* (1.2–17.1)   | 4/6                       | 0.71 (0.19–1.81)  |
| Other Urinary Organs                     | 2/0                 | 7.8 (0.9–28.1)    | 1/1                    | 1.1 (0.0–6.0)    | 0/0                    | 0                 | 5/2                       | 2.0 (0.7–4.7)     |

|                                     |       |                  |       |                            |       |                 |       |                   |
|-------------------------------------|-------|------------------|-------|----------------------------|-------|-----------------|-------|-------------------|
| Eye and Orbit - Non-Melanoma        | 0/0   | 0                | 0/0   | 0                          | 0/0   | 0               | 1/1   | 1.3 (0.0–7.3)     |
| Eye and Orbit - Melanoma            | 0/1   | 0                | 4/2   | 1.8 (0.5–4.5)              | 1/1   | 1.0 (0.0–5.8)   | 4/6   | 0.64 (0.17–1.63)  |
| Brain                               | 5/5   | 1.1 (5.3–2.5)    | 21/16 | 1.3 (0.8–2.0)              | 4/7   | 0.55 (0.15–1.4) | 23/44 | 0.53* (0.34–0.79) |
| Cranial Nerves Other Nervous System | 1/0   | 3.1 (0.1–17.4)   | 0/1   | 0                          | 0/1   | 0               | 4/2   | 1.8 (0.5–4.6)     |
| Thyroid                             | 13/14 | 0.93 (14.5–1.59) | 41/29 | 1.4 <sup>†</sup> (1.0–1.9) | 19/30 | 0.64 (0.39–1)   | 99/91 | 1.1 (0.9–1.3)     |
| Thymus                              | 1/0   | 2.9 (0.1–16.1)   | 1/1   | 1.1 (0.0–6.1)              | 0/1   | 0               | 2/3   | 0.77 (0.09–2.78)  |
| Adrenal Gland                       | 0/0   | 0                | 2/1   | 3.5 (0.4–12.7)             | 0/0   | 0               | 0/2   | 0                 |
| Other Endocrine                     | 0/0   | 0                | 0/0   | 0                          | 0/0   | 0               | 0/1   | 0                 |
| Mesothelioma                        | 1/0   | 2.1 (0.1–11.7)   | 1/2   | 0.50 (0.01–2.8)            | 2/1   | 3.3 (0.4–12.0)  | 4/5   | 0.76 (0.21–1.95)  |
| Kaposi Sarcoma                      | 0/0   | 0                | 0     | 0                          | 1/0   | 6.8 (0.2–37.7)  | 2/1   | 1.8 (0.2–6.6)     |

Abbreviations: SIR: standardized incidence ratio; SEER: surveillance, epidemiology, and end results; RT: radiotherapy; no RT: not received radiotherapy; CI: confidence interval; O: observed number of cancer patients; E: expected number of cancer patients. <sup>†</sup>P value of SIR <0.05 was considered significant. <sup>#</sup>The 95% CI was automatically generated by the SEER MP-SIR. <sup>\*</sup>Cancers site SIR of the tongue, tonsil, oropharynx, vagina, vulva, anus, rectum, esophagus, lung and bronchus, bladder, female breast, and ovary were showed in manuscript.
